# Supplementary material
Source: PubMed Central journal article supplement (PMC10094192)
Supplement: ehp11896.s001.acco.pdf [file ehp11896.s001.acco.pdf]

**Note to readers with disabilities:** *EHP* strives to ensure that all journal content is accessible to all readers. However, some figures and Supplemental Material published in *EHP* articles may not conform to [508 standards](#) due to the complexity of the information being presented. If you need assistance accessing journal content, please contact [ehp508@niehs.nih.gov](mailto:ehp508@niehs.nih.gov). Our staff will work with you to assess and meet your accessibility needs within 3 working days.

### **Supplemental Material**

#### **Association between Organophosphate Ester Exposure and Insulin Resistance with Glycometabolic Disorders among Older Chinese Adults 60–69 Years of Age: Evidence from the China BAPE Study**

Enmin Ding, Fuchang Deng, Jianlong Fang, Tiantian Li, Minmin Hou, Juan Liu, Ke Miao, Wenyan Yan, Ke Fang, Wanying Shi, Yuanzheng Fu, Yuanyuan Liu, Haoran Dong, Li Dong, Changming Ding, Xiaohui Liu, Krystal J. Godri Pollitt, John S. Ji, Yali Shi, Yaqi Cai, Song Tang, and Xiaoming Shi

#### **Table of Contents**

**Table S1.** Variable information of 17 blood OPEs and 11 urine OPE metabolites.

**Table S2.** Descriptive statistics of the results from the daily time-activity surveys (for the three consecutive days prior to the physical examination) of participants for each of the five visits.

**Table S3.** Changes in the z-scores of glycometabolic markers with a quantile increase in the mixture concentration.

**Table S4.** Relative weight of each pollutant within four chemical mixtures.

**Table S5.** Proportions and overall averages of associated serum metabolite in each class for the key OPEs.

**Table S6.** Proportions and overall averages of the associated urine metabolite in each class for the key OPEs.

**Table S7.** Representative toxicological literature on the associations between OPEs and glycometabolic marker.

**Table S8.** Representative toxicological literature on the molecular mechanisms of OPEs.

**Figure S1.** Pairwise spearman correlations of the 28 OPE exposures.

**Figure S2.** Sensitivity analysis results of the associations between OPE exposures and glycometabolic markers.

**Figure S3.** Stratification analysis results of the associations between OPE exposures and glycometabolic markers by sex.

**Figure S4.** Common and specific biomolecular intermediators of individual OPEs.

## **References**

**Additional File-** Excel Document

## Supplemental Tables

**Table S1.** Variable information of 17 blood OPEs and 11 urine OPE metabolites.

| No. | Family     | Abbreviation | Full name                             | Detection frequency (%) | LOD   | Median (P25-P75)   | IQR  | SD   | ICC   | Transformation |
|-----|------------|--------------|---------------------------------------|-------------------------|-------|--------------------|------|------|-------|----------------|
| 1   | Blood      | TPHP         | Tri-phenyl phosphate                  | 78                      | 0.11  | 0.40 (0.14-1.70)   | 1.56 | 1.24 | 0.16  | Log10          |
| 2   | OPEs       | EHDPP        | 2-Ethylhexyl di-phenyl phosphate      | 77                      | 0.03  | 0.21 (0.04-0.40)   | 0.35 | 0.30 | 0.04  | Power 1/3      |
| 3   |            | TCIPP        | Tri(1-chloro-2-propyl) phosphate      | 77                      | 0.13  | 0.74 (0.19-1.36)   | 1.17 | 0.92 | 0.05  | Power 1/3      |
| 4   |            | TnBP         | Tri-n-butyl phosphate                 | 59                      | 0.15  | 0.25 (0.07-0.62)   | 0.54 | 0.75 | 0.05  | Log10          |
| 5   |            | TCEP         | Tri(2-chloroethyl) phosphate          | 56                      | 0.22  | 0.30 (0.11-0.77)   | 0.66 | 0.56 | 0.03  | Log10          |
| 6   |            | TBP          | Tributyl phosphate                    | 55                      | 0.20  | 0.49 (0.10-1.31)   | 1.21 | 1.51 | 0.04  | Log10          |
| 7   |            | TEP          | Triethyl phosphate                    | 54                      | 0.06  | 0.14 (0.03-0.72)   | 0.69 | 1.29 | 0.04  | Log10          |
| 8   |            | TiBP         | Tri-iso-butyl phosphate               | 51                      | 0.22  | 0.23 (0.11-0.75)   | 0.64 | 0.89 | 0.03  | Log10          |
| 9   |            | TEHP         | Tris(2-ethylhexyl) phosphate          | 51                      | 0.09  | 0.09 (0.04-0.38)   | 0.34 | 0.50 | 0.06  | Log10          |
| 10  |            | BABP         | Bisphenol-A bis(diphenyl phosphate)   | 47                      | 0.004 | 0.002 (0.002-0.01) | 0.01 | 0.01 | 0.02  | Log10          |
| 11  |            | TBOEP        | Tri(2-butoxyethyl) phosphate          | 41                      | 0.05  | 0.03 (0.03-0.20)   | 0.18 | 0.70 | 0.03  | Log10          |
| 12  |            | TDCPP        | Tris(1,3-dichloro-2-propyl) phosphate | 34                      | 0.21  | 0.11 (0.11-0.32)   | 0.21 | 0.32 | 0.02  | Log10          |
| 13  |            | TMPP         | Trimethylphenyl phosphate             | 33                      | 0.02  | 0.01 (0.01-0.04)   | 0.03 | 0.03 | 0.04  | Log10          |
| 14  |            | RDP          | Resorcinol bis(diphenyl phosphate)    | 21                      | 0.02  | 0.01 (0.01-0.01)   | 0.00 | 0.06 | 0.02  | Log10          |
| 15  |            | TMP          | Trimethyl phosphate                   | 16                      | 0.15  | 0.07 (0.07-0.07)   | 0.00 | 0.67 | 0.01  | Log10          |
| 16  |            | CDPP         | Cresyl diphenyl phosphate             | 7                       | 0.17  | 0.08 (0.08-0.08)   | 0.00 | 0.13 | 0.02  | Log10          |
| 17  |            | TPrP         | Tripropyl phosphate                   | 1                       | 0.02  | 0.01 (0.01-0.01)   | 0.00 | 0.01 | 0.001 | Log10          |
| 18  | Urine      | DPHP         | Di-phenyl phosphate                   | 79                      | 0.04  | 0.11 (0.07-0.19)   | 0.11 | 0.46 | 0.02  | Log10          |
| 19  | OPE        | DEHP         | Di(2-ethylhexyl) phosphate            | 77                      | 0.07  | 0.21 (0.09-0.41)   | 0.32 | 1.61 | 0.02  | Log10          |
| 20  | metabolite | BDCPP        | Bis(1,3-dichloro-2-propyl) phosphate  | 76                      | 0.05  | 0.16 (0.07-0.28)   | 0.20 | 0.31 | 0.02  | Log10          |
| 21  |            | DBP          | Dibutyl phosphate                     | 69                      | 0.01  | 0.07 (0.03-0.18)   | 0.15 | 0.15 | 0.09  | Log10          |
| 22  |            | BMPP         | Bis(2-methylphenyl phosphate)         | 65                      | 0.004 | 0.02 (0.01-0.03)   | 0.02 | 0.03 | 0.18  | Log10          |
| 23  |            | BCIPP        | Bis(1-chloro-2-propyl) phosphate      | 28                      | 0.04  | 0.04 (0.03-0.08)   | 0.05 | 0.14 | 0.06  | Log10          |

|    |          |                                               |    |      |                    |      |      |       |       |
|----|----------|-----------------------------------------------|----|------|--------------------|------|------|-------|-------|
| 24 | DPHP-OH  | Hydroxyphenyl diphenyl phosphate              | 21 | 0.02 | 0.02 (0.01-0.04)   | 0.03 | 0.06 | 0.05  | Log10 |
| 25 | BCEP     | Bis(2-chloroethyl) phosphate                  | 20 | 0.63 | 0.52 (0.35-1.03)   | 0.69 | 2.08 | 0.11  | Log10 |
| 26 | BBOEP    | Bis(2-butoxyethyl) phosphate                  | 13 | 0.03 | 0.02 (0.02-0.05)   | 0.03 | 1.58 | 0.002 | Log10 |
| 27 | EHDPP-OH | Hydroxyphenyl 2-ethylhexyl-diphenyl phosphate | 13 | 0.04 | 0.003 (0.002-0.01) | 0.00 | 0.05 | 0.01  | Log10 |
| 28 | BBOEHEP  | Bis(2-butoxyethyl) hydroxyethyl phosphate     | 3  | 0.02 | 0.02 (0.01-0.03)   | 0.01 | 0.06 | 0.06  | Log10 |

---

Note: unit for LOD is  $\mu\text{g/L}$ ; unit for blood OPEs is  $\mu\text{g/L}$ , and unit for urine OPE metabolites is  $\mu\text{g/g}$  creatinine; LOD: limit of detection; IQR: inter-quartile range; SD: standard deviation; ICC: intra-class correlation coefficient.

**Table S2.** Descriptive statistics of the results from the daily time-activity surveys (for the three consecutive days prior to the physical examination) of participants for each of the five visits.

| Characteristics        | 1 <sup>st</sup><br>(N=66)                 | 2 <sup>nd</sup><br>(N=74) | 3 <sup>rd</sup><br>(N=71) | 4 <sup>th</sup><br>(N=71) | 5 <sup>th</sup><br>(N=71) |
|------------------------|-------------------------------------------|---------------------------|---------------------------|---------------------------|---------------------------|
| Extra Diet in last 72h | Number of subjects (% subject population) |                           |                           |                           |                           |
| Fruit                  | 27 (40.9)                                 | 38 (51.4)                 | 35 (49.3)                 | 34 (47.9)                 | 39 (54.9)                 |
| Milk                   | 3 (4.5)                                   | 4 (5.4)                   | 5 (7.0)                   | 4 (5.6)                   | 4 (5.6)                   |
| Rice                   | 5 (7.6)                                   | 13 (17.6)                 | 7 (9.9)                   | 11 (15.5)                 | 10 (14.1)                 |
| Nuts                   | 4 (6.1)                                   | 10 (13.5)                 | 16 (22.5)                 | 21 (29.6)                 | 18 (25.4)                 |
| Eggs                   | 0 (0)                                     | 0 (0)                     | 0 (0)                     | 2 (2.8)                   | 1 (1.4)                   |
| Seafood                | 2 (3.0)                                   | 5 (6.8)                   | 3 (4.2)                   | 2 (2.8)                   | 1 (1.4)                   |
| Meat                   | 3 (4.5)                                   | 2 (2.7)                   | 3 (4.2)                   | 2 (2.8)                   | 3 (4.2)                   |
| Vegetables             | 2 (3.0)                                   | 4 (5.4)                   | 7 (9.9)                   | 10 (14.1)                 | 5 (7.0)                   |
| Bean products          | 0 (0)                                     | 2 (2.7)                   | 0 (0)                     | 1 (1.4)                   | 1 (1.4)                   |

**Table S3.** Changes in the z-scores of glycometabolic markers with a quantile increase in the mixture concentration.

| Glycometabolic markers | Quantile midpoint | Line predication | Low limit of line predication | Up limit of linpred | Low limit of simulation | Up limit of simulation |
|------------------------|-------------------|------------------|-------------------------------|---------------------|-------------------------|------------------------|
| FPG                    | 0.13              | 0.77             | 0.72                          | 0.82                | 0.74                    | 0.79                   |
| FPG                    | 0.38              | 0.82             | 0.79                          | 0.84                | 0.79                    | 0.84                   |
| FPG                    | 0.63              | 0.86             | 0.86                          | 0.86                | 0.81                    | 0.91                   |
| FPG                    | 0.88              | 0.91             | 0.89                          | 0.94                | 0.84                    | 0.98                   |
| GSP                    | 0.13              | 2.49             | 2.44                          | 2.54                | 2.47                    | 2.51                   |
| GSP                    | 0.38              | 2.53             | 2.51                          | 2.55                | 2.50                    | 2.55                   |
| GSP                    | 0.63              | 2.57             | 2.57                          | 2.57                | 2.52                    | 2.61                   |
| GSP                    | 0.88              | 2.61             | 2.58                          | 2.63                | 2.53                    | 2.68                   |
| FINS                   | 0.13              | 0.44             | 0.37                          | 0.51                | 0.36                    | 0.51                   |
| FINS                   | 0.38              | 0.49             | 0.46                          | 0.53                | 0.46                    | 0.53                   |
| FINS                   | 0.63              | 0.55             | 0.55                          | 0.55                | 0.51                    | 0.59                   |
| FINS                   | 0.88              | 0.61             | 0.57                          | 0.64                | 0.54                    | 0.68                   |
| HOMA-IR                | 0.13              | -0.13            | -0.30                         | 0.04                | -0.24                   | -0.01                  |
| HOMA-IR                | 0.38              | -0.01            | -0.09                         | 0.07                | -0.09                   | 0.07                   |
| HOMA-IR                | 0.63              | 0.11             | 0.11                          | 0.11                | -0.04                   | 0.25                   |
| HOMA-IR                | 0.88              | 0.23             | 0.14                          | 0.31                | -0.01                   | 0.44                   |

Note: see also **Figure 3B**.

**Table S4.** Relative weight of each pollutant within four chemical mixtures.

| Pollutant | FPG             |                 | Pollutant | GSP             |                 | Pollutant | FINS            |                 | Pollutant | HOMA-IR         |                 |
|-----------|-----------------|-----------------|-----------|-----------------|-----------------|-----------|-----------------|-----------------|-----------|-----------------|-----------------|
|           | Negative weight | Positive weight |
| TPHP      | -               | 0.14            | TPHP      | -               | 0.19            | TPHP      | -               | 0.44            | TPHP      | -               | 0.17            |
| TMPP      | -               | 0.54            | TMPP      | -               | 0.46            | DPHP      | -               | 0.13            | TnBP      | -               | 0.06            |
| EHDPP     | 1.00            | -               | EHDPP-OH  | 0.03            | -               | DBP       | -               | 0.43            | TMPP      | -               | 0.20            |
| DPHP      | -               | 0.01            | EHDPP     | 0.97            | -               |           |                 |                 | TiBP      | -               | 0.29            |
| DBP       | -               | 0.24            | DPHP      | -               | 0.02            |           |                 |                 | TBP       | 0.24            | -               |
| BCEP      | -               | 0.07            | DBP       | -               | 0.26            |           |                 |                 | EHDPP     | 0.57            | -               |
|           |                 |                 | BCEP      | -               | 0.07            |           |                 |                 | DPHP      | -               | 0.06            |
|           |                 |                 |           |                 |                 |           |                 |                 | DBP       | -               | 0.23            |
|           |                 |                 |           |                 |                 |           |                 |                 | BCEP      | 0.18            | -               |

Note: see also **Figure 3C**.

**Table S5.** Proportions and overall averages of associated serum metabolite in each class for the key OPEs.

| Pollutant | Serum Metabolite |               |                        |               |               |               |                                   |                |               |
|-----------|------------------|---------------|------------------------|---------------|---------------|---------------|-----------------------------------|----------------|---------------|
|           | Amino Acid       | Carbohydrate  | Cofactors and Vitamins | Energy        | Lipid         | Nucleotide    | Partially Characterized Molecules | Peptide        | Xenobiotics   |
| TMPP      | 12.38% 4.76%     | 0.00% 22.73%  | 21.05% 2.63%           | 20.00% 10.00% | 3.96% 18.18%  | 20.51% 20.51% | 8.33% 0.00%                       | 43.18% 31.82%  | 6.54% 3.27%   |
| TPHP      | 13.33% 14.29%    | 4.55% 36.36%  | 23.68% 15.79%          | 30.00% 20.00% | 7.93% 26.34%  | 20.51% 23.08% | 33.33% 8.33%                      | 47.73% 29.55%  | 4.58% 7.19%   |
| TiBP      | 1.43% 3.33%      | 9.09% 9.09%   | 5.26% 0.00%            | 10.00% 0.00%  | 0.70% 2.80%   | 0.00% 5.13%   | 0.00% 0.00%                       | 9.09% 22.73%   | 1.31% 3.92%   |
| DBP       | 2.38% 6.19%      | 0.00% 9.09%   | 5.26% 13.16%           | 0.00% 20.00%  | 2.56% 5.59%   | 0.00% 7.69%   | 8.33% 8.33%                       | 2.27% 4.55%    | 11.76% 7.19%  |
| DPHP      | 0.95% 1.43%      | 0.00% 0.00%   | 5.26% 5.26%            | 0.00% 0.00%   | 3.03% 0.93%   | 0.00% 5.13%   | 0.00% 0.00%                       | 0.00% 2.27%    | 1.96% 0.00%   |
| Total     | 30.47% 30.00%    | 13.64% 77.27% | 60.51% 36.84%          | 60.00% 50.00% | 18.18% 53.84% | 40.12% 61.54% | 49.33% 16.66%                     | 102.25% 90.92% | 26.15% 21.57% |
| Average   | 6.10% 6.00%      | 2.73% 15.45%  | 12.11% 7.37%           | 12.00% 10.00% | 3.64% 10.77%  | 8.21% 12.31%  | 10.00% 3.33%                      | 20.45% 18.18%  | 5.23% 4.31%   |

Note: red (left) and blue (right) colors represent positive and negative associations, respectively; see also **Figure 4F**.



**Table S6.** Proportions and overall averages of the associated urine metabolite in each class for the key OPEs.

| Pollutant | Urine Metabolite |               |                        |               |               |               |               |               |                             |
|-----------|------------------|---------------|------------------------|---------------|---------------|---------------|---------------|---------------|-----------------------------|
|           | Amino Acid       | Carbohydrate  | Cofactors and Vitamins | Energy        | Global        | Lipid         | Nucleotide    | Other         | Other secondary metabolites |
| TMPP      | 0.00% 0.42%      | 0.00% 0.00%   | 0.00% 0.00%            | 0.00% 0.00%   | 0.00% 0.00%   | 0.00% 0.00%   | 0.00% 1.69%   | 0.00% 0.00%   | 0.00% 0.00%                 |
| TPHP      | 1.26% 3.77%      | 5.48% 5.48%   | 7.50% 2.50%            | 0.00% 20.00%  | 3.45% 0.00%   | 0.00% 6.52%   | 0.00% 11.86%  | 2.03% 5.41%   | 0.00% 10.00%                |
| TiBP      | 0.84% 0.00%      | 0.00% 0.00%   | 5.00% 0.00%            | 0.00% 0.00%   | 0.00% 0.00%   | 0.00% 0.00%   | 0.00% 0.00%   | 0.00% 0.00%   | 0.00% 0.00%                 |
| DBP       | 12.97% 21.34%    | 26.03% 24.66% | 15.00% 22.50%          | 20.00% 0.00%  | 0.00% 31.03%  | 6.52% 23.91%  | 10.17% 42.37% | 9.01% 17.79%  | 40.00% 0.00%                |
| DPHP      | 10.88% 17.99%    | 19.18% 17.81% | 10.00% 27.50%          | 0.00% 0.00%   | 10.34% 27.59% | 4.35% 21.74%  | 6.78% 28.81%  | 10.14% 12.39% | 10.00% 0.00%                |
| Total     | 25.95% 43.52%    | 50.69% 47.95% | 37.50% 52.50%          | 20.00% 20.00% | 13.79% 58.62% | 10.87% 52.17% | 16.95% 84.73% | 21.18% 35.59% | 50.00% 10.00%               |
| Average   | 5.19% 8.70%      | 10.14% 9.59%  | 7.50% 10.50%           | 4.00% 4.00%   | 2.76% 11.72%  | 2.17% 10.43%  | 3.39% 16.95%  | 4.23% 7.12%   | 10.00% 2.00%                |

Note: red (left) and blue (right) colors represent positive and negative associations, respectively; see also **Figure 4G**.

**Table S7.** Representative toxicological literature on the associations between OPEs and glycometabolic marker.

| Pollutant | No | Type           | Subject                 | Outcome                                                                               | Main Results                                                                                                                                                                                                                                                                                                                                                                                  | Journal                 | Year               |
|-----------|----|----------------|-------------------------|---------------------------------------------------------------------------------------|-----------------------------------------------------------------------------------------------------------------------------------------------------------------------------------------------------------------------------------------------------------------------------------------------------------------------------------------------------------------------------------------------|-------------------------|--------------------|
| TPHP      | 1  | <i>In vivo</i> | Pubertal mice           | Adiponectin; HOMA-IR                                                                  | We observed that the insulin-sensitizing hormone (adiponectin) was inhibited in female serum while stimulated in males after oral administration of TPhP. Correspondingly, we found a high index of HOMA-IR in females.                                                                                                                                                                       | J Hazard Mater          | 2020 <sup>2</sup>  |
|           | 2  | <i>In vivo</i> | Adult male mice         | Blood biochemistry; Gene expression; Gut microbiota compositions; Metabolic functions | Results showed that TPHP exposure led to increased body weight, liver weight, fat mass, hepatic steatosis, impaired glucose homeostasis, and insulin resistance, and mRNA levels of genes involved in lipid metabolism, especially lipogenesis and lipid accumulation, were significantly altered by TPHP treatment.                                                                          | Environ Pollut          | 2019 <sup>3</sup>  |
|           | 3  | <i>In vivo</i> | Earthworm               | Metabolome                                                                            | Acute TPHP exposure caused significant perturbations of the endogenous metabolome in earthworms, featuring fluctuations in amino acids, glucose, inosine and phospholipids.                                                                                                                                                                                                                   | Sci Rep                 | 2018 <sup>4</sup>  |
|           | 4  | <i>In vivo</i> | Rats                    | Type 2 diabetes mellitus                                                              | Perinatal TPHP exposure accelerated T2DM onset in males and increased plasma non-esterified- fasting fatty acids.                                                                                                                                                                                                                                                                             | Reproductive Toxicology | 2017 <sup>5</sup>  |
|           | 5  | <i>In vivo</i> | Zebrafish               | Hepatic histopathological; metabolomic and transcriptomic responses                   | These results suggest that triphenyl phosphate exposure markedly disturbs hepatic carbohydrate and lipid metabolism in zebrafish. Moreover, DNA replication, the cell cycle, and non-homologous end-joining and base excision repair were strongly affected, thus indicating that triphenyl phosphate hinders the DNA damage repair system in zebrafish liver cells.                          | Sci Rep                 | 2016 <sup>6</sup>  |
|           | 6  | <i>In vivo</i> | C57Bl/6 mice            | Insulin-like growth factor                                                            | A significant decrease in transcript levels of Igf1 and Irs2 was detected in maternal livers, whereas a significant increase in transcript levels of all genes measured was detected in fetal liver. A significant decrease in Igf1 protein levels was detected in maternal liver, however the increase in Igf1 protein levels in fetal livers was not found to be statistically significant. | Birth Defects Res       | 2018 <sup>7</sup>  |
|           | 7  | <i>In vivo</i> | Adult mice              | Metabolomics                                                                          | Both TPP and DPP had no negative effect on uterine weight, glucose tolerance, and estradiol. 1H-NMR-based metabolomics revealed a sex-specific metabolic disturbance of TPP.                                                                                                                                                                                                                  | Environ Pollut          | 2018 <sup>8</sup>  |
|           | 8  | <i>In vivo</i> | Female mice             | Expression of genes glucose metabolism and xenobiotic metabolism                      | In the mediobasal hypothalamus, OPFR increased Pdyn, Tac2, Esr1, and Pparg in PND 14 females. In the liver, OPFR increased Pparg and suppressed Insr, G6pc, and Fasn in PND 14 males and increased Esr1, Foxo1, Dgat2, Fasn, and Cyb2b10 in PND 14 females.                                                                                                                                   | Reprod Toxicol          | 2020 <sup>9</sup>  |
|           | 9  | <i>In vivo</i> | Wild-type C57Bl/6J dams | Glucose homeostasis; metabolism                                                       | OPFR exposure interacted with HFD to increase fasting glucose in females and alter glucose and insulin tolerance in male offspring.                                                                                                                                                                                                                                                           | J Appl Toxicol          | 2021 <sup>10</sup> |

|      |    |                 |                                              |                                                     |                                                                                                                                                                                                                                                                                                 |                            |                    |
|------|----|-----------------|----------------------------------------------|-----------------------------------------------------|-------------------------------------------------------------------------------------------------------------------------------------------------------------------------------------------------------------------------------------------------------------------------------------------------|----------------------------|--------------------|
|      | 10 | <i>In vivo</i>  | Adult mice                                   | Metabolism                                          | Despite no marked effect of OPFRs on glucose or insulin tolerance, OPFR treatment altered circulating insulin and leptin in females and ghrelin in males.                                                                                                                                       | J Toxicol Environ Health A | 2020 <sup>11</sup> |
|      | 11 | <i>In vivo</i>  | adult wild-type (WT) and ER $\alpha$ KO mice | Glucose and insulin tolerance                       | FR increased fasting glucose levels in males, and BDE-47 augmented glucose clearance in females. In males, OPFR increased ghrelin but decreased leptin and insulin independent of body weight.                                                                                                  | Toxicol Sci                | 2018 <sup>12</sup> |
|      | 12 | <i>In vivo</i>  | Mice                                         | Glucose and insulin tolerance                       | Interestingly, female PPAR $\gamma$ KO mice, but not males, experienced many novel OPFR effects not noted in WT mice, including decreased fat mass, altered feeding behavior and efficiency, improved insulin sensitivity, elevated plasma ghrelin and hypothalamic expression of its receptor. | J Toxicol Environ Health A | 2022 <sup>13</sup> |
|      | 13 | <i>In vivo</i>  | Adult mice                                   | Food intake patterns, glucose and insulin tolerance | Male ER $\alpha$ KO mice fed LFD experienced decreased feeding efficiency and altered insulin tolerance, whereas their female counterparts displayed less fat mass and circulating ghrelin when exposed to OPFRs.                                                                               | J Toxicol Environ Health A | 2022 <sup>14</sup> |
|      | 14 | <i>In vitro</i> | 3T3-L1 cells                                 | Resistin; leptin                                    | Triphenyl phosphate (TPhP), tricresyl phosphate (TCP), TDCPP, TBP and TBEP enhanced glucose uptake at both basal and insulin-stimulated status.                                                                                                                                                 | Environ Pollut             | 2022 <sup>15</sup> |
|      | 15 | <i>In vitro</i> | Hep G2 cell                                  | Metabolic disturbances                              | We found that when HepG2 cells were exposed to TMPP, TPHP and TDBPP, the main metabolic sub-network disturbances focused on metabolism linked with oxidative stress, osmotic pressure equilibrium, and glucocorticoid and mineralocorticoid receptor antagonist activities.                     | Sci Total Environ          | 2019 <sup>16</sup> |
|      | 16 | <i>In vitro</i> | 3T3-L1 cells                                 | Glucose uptake                                      | This study suggests that TPhP increases adipogenic differentiation, glucose uptake, and lipolysis in 3T3-L1 cells through endocrine and noradrenergic mechanisms.                                                                                                                               | Toxicol In Vitro           | 2017 <sup>17</sup> |
|      | 17 | <i>In vitro</i> | RAW264.7 murine macrophage cells             | Lipidomic analysis; insulin resistance              | Correspondingly, exposure to 10 and 20 $\mu$ M TPHP induced endoplasmic reticulum (ER) stress and inflammatory responses, which have been linked to metabolic dysfunction such as insulin resistance and hypertriglyceridemia.                                                                  | Environ Pollut             | 2020 <sup>18</sup> |
| DPHP | 18 | <i>In vitro</i> | 3T3-L1 cells                                 | Insulin-stimulated                                  | DPhP increased the insulin-stimulated 2-NBDG uptake only at 100 $\mu$ M DPhP.                                                                                                                                                                                                                   | Toxicol In Vitro           | 2017 <sup>17</sup> |

**Table S8.** Representative toxicological literature on the molecular mechanisms of OPEs.

| Pollutant | Pathway          | No | Type            | Subject                              | Outcome                                                                                                                                                                  | Main results                                                                                                                                                                                                                                                                                                                                                                                                                                                                                                                                        | Journal              | Year               |
|-----------|------------------|----|-----------------|--------------------------------------|--------------------------------------------------------------------------------------------------------------------------------------------------------------------------|-----------------------------------------------------------------------------------------------------------------------------------------------------------------------------------------------------------------------------------------------------------------------------------------------------------------------------------------------------------------------------------------------------------------------------------------------------------------------------------------------------------------------------------------------------|----------------------|--------------------|
| TPhP      | Oxidative Stress | 1  | <i>In vivo</i>  | Labeo rohita fingerlings             | reactive oxygen species (ROS) production; lipid peroxidation (LPO) rates                                                                                                 | The reactive oxygen species (ROS) production and lipid peroxidation (LPO) rates were significantly higher in tissues (brain, liver, and kidney) of TPhP-treated groups. Interestingly, superoxide dismutase (SOD) and catalase (CAT) activities were remarkably decreased in tissues following TPhP exposure.                                                                                                                                                                                                                                       | Chem Res Toxicol     | 2021 <sup>19</sup> |
|           |                  | 2  | <i>In vivo</i>  | Zebrafish                            | ROS generation; Lipid peroxidation (LPO); Superoxide dismutase (SOD) activity; Catalase (CAT) activity; Glutathione-S-transferase (GST) activity; Antioxidant activities | The hepatic glucose production (except short-term TPhP treatment up to 48 h), aspartate transaminase, alanine transaminase, lactate dehydrogenase, reactive oxygen species generation, lipid peroxide, and catalase activities were found to be increased in TPhP exposed groups when compared to control groups (normal and solvent control groups). Our study reveals that TPhP can potentially cause antioxidants imbalance, alterations in enzymological and biochemical profiles, and morphological anomalies in hepatic tissues of zebrafish. | Neurotoxicol Teratol | 2020 <sup>20</sup> |
|           |                  | 3  | <i>In vitro</i> | Murine dendritic cells               | anti-oxidant enzyme hemeoxygenase-1                                                                                                                                      | Concentrations of TPhP and TDCIPP of 50 $\mu$ M were cytotoxic to BMDCs. At these cytotoxic concentrations, TPhP exposure induced an activated phenotype in steady state DCs, while HDM exposed DCs acquired a tolerogenic phenotype. The cytotoxic concentrations induced the anti-oxidant enzyme hemeoxygenase-1, which is a marker for oxidative stress.                                                                                                                                                                                         | Chemosphere          | 2017 <sup>21</sup> |
|           |                  | 4  | <i>In vitro</i> | HepaRG cells                         | biomarkers of the oxidative stress TP                                                                                                                                    | Potential biomarkers belonging to different TPs were found for APAP and TPhP. For APAP, the biomarkers were related to a decrease in unsaturated phospholipids, and for TPhP to an accumulation of phosphoglycerolipids and increase of palmitoyl lysophosphatidylcholine.                                                                                                                                                                                                                                                                          | Toxicol In Vitro     | 2015 <sup>22</sup> |
|           |                  | 5  | <i>In vitro</i> | Non-small cell lung cancer A549 cell | reactive oxygen species (ROS) production                                                                                                                                 | OPFRs and BFRs could cause the reduction of cell viability of A549 cell in both dose- and time-dependent manner after exposure for 24 and 48 h. Simultaneously, excessive generation of reactive oxygen species (ROS), mitochondrial membrane potential (MMP) dysfunction.                                                                                                                                                                                                                                                                          | Chemosphere          | 2019 <sup>23</sup> |
|           |                  | 6  | <i>In vitro</i> | Hep G2 cell line                     | metabolic disturbances;                                                                                                                                                  | When HepG2 cells were exposed to TMPP, TPhP and TDBPP, the main metabolic sub-network disturbances focused on metabolism linked with oxidative stress, osmotic pressure equilibrium, and glucocorticoid and                                                                                                                                                                                                                                                                                                                                         | Sci Total Environ    | 2019 <sup>16</sup> |

|    |                 |                                                               |                                                                                                                         |                                                                                                                                                                                                                                                                                                                                                                                                                                                                                                                                                                                       |                                                     |                    |
|----|-----------------|---------------------------------------------------------------|-------------------------------------------------------------------------------------------------------------------------|---------------------------------------------------------------------------------------------------------------------------------------------------------------------------------------------------------------------------------------------------------------------------------------------------------------------------------------------------------------------------------------------------------------------------------------------------------------------------------------------------------------------------------------------------------------------------------------|-----------------------------------------------------|--------------------|
| 7  | <i>In vitro</i> | H4IIE cells                                                   | oxidative stress responses (gpx1, gr, gsta2, cat)                                                                       | mineralocorticoid receptor antagonist activities. Cells treated with TCEP and TPP showed opposite trends between cyp11a1 mRNA and enzymatic activities. Furthermore, exposure to TCEP increased gsta2 and cat especially at the highest concentration tested, whereas TPP produced significant changes only for gr and cat at the highest concentration.                                                                                                                                                                                                                              | Toxicol Appl Pharmacol                              | 2019 <sup>24</sup> |
| 8  | <i>In vitro</i> | TM3 cells                                                     | superoxide dismutase (SOD), catalase (CAT), glutathione peroxidase (GPX) and glutathione S-transferase (GST) activities | 3 $\beta$ -hydroxysteroid dehydrogenase (3 $\beta$ -HSD) and 17 $\beta$ -hydroxysteroid dehydrogenase (17 $\beta$ -HSD) were dramatically reduced by TPP and TCEP treatments, especially with the high dosage for 24 h. TPP and TCEP treatments for 24 h caused significant decreases in T levels in the medium. Furthermore, co-treatments of hCG with TPP or TCEP could inhibit hCG-induced changes in the expression of P450 <sub>scc</sub> , P450-17 $\alpha$ and 17 $\beta$ -HSD and T levels. TPP and TCEP could induce oxidative stress and endocrine disruption in TM3 cells. | Reprod Toxicol                                      | 2015 <sup>25</sup> |
| 9  | <i>In vitro</i> | Human normal liver cell (L02)                                 | multi-omic (transcriptomic, proteomic, and metabolomic)                                                                 | Transcriptomic analysis revealed that TPP exposure markedly affected cell apoptosis, oncogene activation, REDOX homeostasis, DNA damage and repair. Additionally, proteomic analysis found that the related proteins associated with apoptosis, oxidative stress, metabolism and membrane structure were affected.                                                                                                                                                                                                                                                                    | Ecotoxicol Environ Saf                              | 2020 <sup>26</sup> |
| 10 | <i>In vitro</i> | MA-10 mouse Leydig tumor cells                                | superoxide production                                                                                                   | All of the OPFRs significantly increased (10 $\mu$ M, 1.7-4.4-fold) superoxide production whereas BDE-47 had no significant effect. Basal progesterone production was significantly increased (10 $\mu$ M, 1.5 to 3-fold) by 2-ethylhexyl diphenyl phosphate, isodecyl diphenyl phosphate, isopropylated triphenyl phosphate, tert-butylphenyl diphenyl phosphate, and tricresyl phosphate, while BDE-47, triphenyl phosphate and tri-o-cresyl phosphate had no effect.                                                                                                               | Toxicol Sci                                         | 2016 <sup>27</sup> |
| 11 | <i>In vitro</i> | HepG2 hepatoma cells, A549 lung cancer cells and Caco-2 colon | cell viability; reactive oxygen species (ROS) level                                                                     | All these four OPFRs could inhibit cell viability, overproduce ROS level, induce DNA lesions and increase the LDH leakage.                                                                                                                                                                                                                                                                                                                                                                                                                                                            | J Environ Sci Health A Tox Hazard Subst Environ Eng | 2016 <sup>28</sup> |

|           |                 |                 |                                               |                                        |                                                                                                                                                                                                                                                                                                                                                                                                                                                                  |                                 |                    |  |
|-----------|-----------------|-----------------|-----------------------------------------------|----------------------------------------|------------------------------------------------------------------------------------------------------------------------------------------------------------------------------------------------------------------------------------------------------------------------------------------------------------------------------------------------------------------------------------------------------------------------------------------------------------------|---------------------------------|--------------------|--|
|           |                 | cancer cells    |                                               |                                        |                                                                                                                                                                                                                                                                                                                                                                                                                                                                  |                                 |                    |  |
| 12        | <i>In vivo</i>  | Male mice       | Endocrine<br>Oxidative stress                 | disruption;                            | Hepatic malondialdehyde (MDA) contents increased significantly in both TPP treated groups, while the contents of glutathione (GSH) decreased significantly in 300 mg/kg TPP and both TCEP treated groups. In addition, the hepatic activities of antioxidant enzymes including glutathione peroxidase (GPX), catalase (CAT) and glutathione S-transferase (GST) as well as their related gene expression were affected by TPP or TCEP exposure.                  | Environ<br>Toxicol<br>Pharmacol | 2015 <sup>29</sup> |  |
| 13        | <i>In vitro</i> | A549 cells      | Intracellular ROS and miSOD analysis          |                                        | The results of the intracellular ROS analysis showed that alkyl-PFRs could cause excessive production of ROS in the nucleus, indicating that PFRs can induce oxidative stress. TEHP and DNBP, which contain longer alkyl chains than the other alkyl-PFRs, induced severe oxidative damage.                                                                                                                                                                      | Chemosphere                     | 2020 <sup>30</sup> |  |
| 14        | <i>Human</i>    | Pregnant women  | Oxidative stress biomarkers of MDA and 8-OHdG |                                        | Thyroid disrupting effects of OPE exposure on mothers and fetuses during pregnancy and the potential influence mediated by the oxidative stresses of DNA damage and lipid peroxidation.                                                                                                                                                                                                                                                                          | Environ Int                     | 2021 <sup>31</sup> |  |
| Apoptosis | 15              | <i>In vitro</i> | JEG-3 cells                                   | Lipid metabolism                       | Although PPAR $\gamma$ and its target CCAAT/enhancer binding proteins (C/EBP $\alpha$ ) was decreased, the TG content and gene expression of SREBP1, ACC, and CD36 decreased when TPP was co-exposed to the PPAR $\gamma$ antagonist GW9662. TPP also induced inflammatory responses, endoplasmic reticulum stress (ERS), and cell apoptosis.                                                                                                                    | Chemosphere                     | 2021 <sup>32</sup> |  |
|           | 16              | <i>In vivo</i>  | Weaned male mice (C57/BL6)                    | Metabolomic; transcriptomic            | RNA-seq data indicated that neuronal transcription processes and cell apoptosis pathway (forkhead box (FOXO), and mitogen-activated protein kinase (MAPK) signaling pathways) were significantly affected by TPP exposure.                                                                                                                                                                                                                                       | Chemosphere                     | 2020 <sup>33</sup> |  |
|           | 17              | <i>In vitro</i> | Human normal liver cell (L02)                 | Transcriptomic; proteomic; metabolomic | TPP could induce human normal liver cell (L02) apoptosis, injury cell ultrastructure and elevate the levels of reactive oxygen species (ROS). Transcriptomic analysis revealed that TPP exposure markedly affected cell apoptosis, oncogene activation, REDOX homeostasis, DNA damage and repair. Additionally, proteomic analysis found that the related proteins associated with apoptosis, oxidative stress, metabolism and membrane structure were affected. | Ecotoxicol<br>Environ Saf       | 2020 <sup>26</sup> |  |

|                |    |                 |                                            |                                                                                                                                                            |                                                                                                                                                                                                                                                                                                                                                                                                                                                                                                                                                                      |                            |                    |
|----------------|----|-----------------|--------------------------------------------|------------------------------------------------------------------------------------------------------------------------------------------------------------|----------------------------------------------------------------------------------------------------------------------------------------------------------------------------------------------------------------------------------------------------------------------------------------------------------------------------------------------------------------------------------------------------------------------------------------------------------------------------------------------------------------------------------------------------------------------|----------------------------|--------------------|
|                | 18 | <i>In vivo</i>  | Pregnant mice                              | the protein levels related to apoptosis                                                                                                                    | Western blot analysis verified that the protein levels related to ERS stress and apoptosis were significantly increased.                                                                                                                                                                                                                                                                                                                                                                                                                                             | Environ Pollut             | 2022 <sup>34</sup> |
|                | 19 | <i>In vitro</i> | Hepatocyte                                 | mitochondrial injury; apoptosis inducing factor (AIF) release; reactive oxygen species (ROS) production; DNA damage; mitochondrial PARP1 dependent pathway | Docking view showed that TPP could interact with helix $\alpha$ J to affect the activation of PARP1 as a molecular initial event. In vitro assays suggested some biochemical events downstream of PARP1 activation, such as mitochondrial injury, apoptosis inducing factor (AIF) release, reactive oxygen species (ROS) production, and DNA damage. Moreover, the apoptosis was alleviated when cells were pretreated with PJ34 hydrochloride (PARP1 inhibitor), suggesting the mitochondrial PARP1 dependent pathway played a pivotal role in L02 cells apoptosis. | Ecotoxicol<br>Environ Saf. | 2021 <sup>35</sup> |
| Inflammasome   | 20 | <i>In vitro</i> | Murine BV-2 microglia cells                | NLRP3 inflammasome activation                                                                                                                              | TBBPA showed indications of possible secondary triggering activity while no changes were seen with TPP.                                                                                                                                                                                                                                                                                                                                                                                                                                                              | Chemosphere                | 2020 <sup>36</sup> |
| Glucocorticoid | 21 | <i>In vitro</i> | Hep G2 cell line                           | glucocorticoid, mineralocorticoid receptor antagonist activities                                                                                           | When HepG2 cells were exposed to TMPP, TPHP and TDBPP, the main metabolic sub-network disturbances focused on metabolism linked with oxidative stress, osmotic pressure equilibrium, and glucocorticoid and mineralocorticoid receptor antagonist activities.                                                                                                                                                                                                                                                                                                        | Sci Total<br>Environ       | 2019 <sup>16</sup> |
|                | 22 | <i>In vitro</i> | CHO cells                                  | CYP17,CYP21, CYP11B1 expression                                                                                                                            | TMPP, TPHP and TDBPP exhibited both GR and MR antagonistic activities.                                                                                                                                                                                                                                                                                                                                                                                                                                                                                               | Environ Sci<br>Technol     | 2017 <sup>37</sup> |
|                | 23 | <i>In vitro</i> | CHO-K1 cells and simian kidney COS-7 cells | glucocorticoid receptor (GR) antagonistic activities                                                                                                       | Hydroxylated TPHP-metabolites also showed ER antagonistic activity at higher concentrations and exhibited pregnane X receptor (PXR) agonistic activity as well as androgen receptor (AR) and glucocorticoid receptor (GR) antagonistic activities at similar levels to those of TPHP.                                                                                                                                                                                                                                                                                | Toxicol Lett               | 2016 <sup>38</sup> |
|                | 24 | <i>In vitro</i> | CHO-K1 cell                                | glucocorticoid receptor (GR) antagonistic activity                                                                                                         | TBP, tris(2-ethylhexyl) phosphate (TEHP), TDCPP, TPhP and TCP showed GR antagonistic activity.                                                                                                                                                                                                                                                                                                                                                                                                                                                                       | Toxicology                 | 2013 <sup>39</sup> |

---

## Supplemental Figures

Figure S1. Pairwise spearman correlations of the 28 OPE exposures.

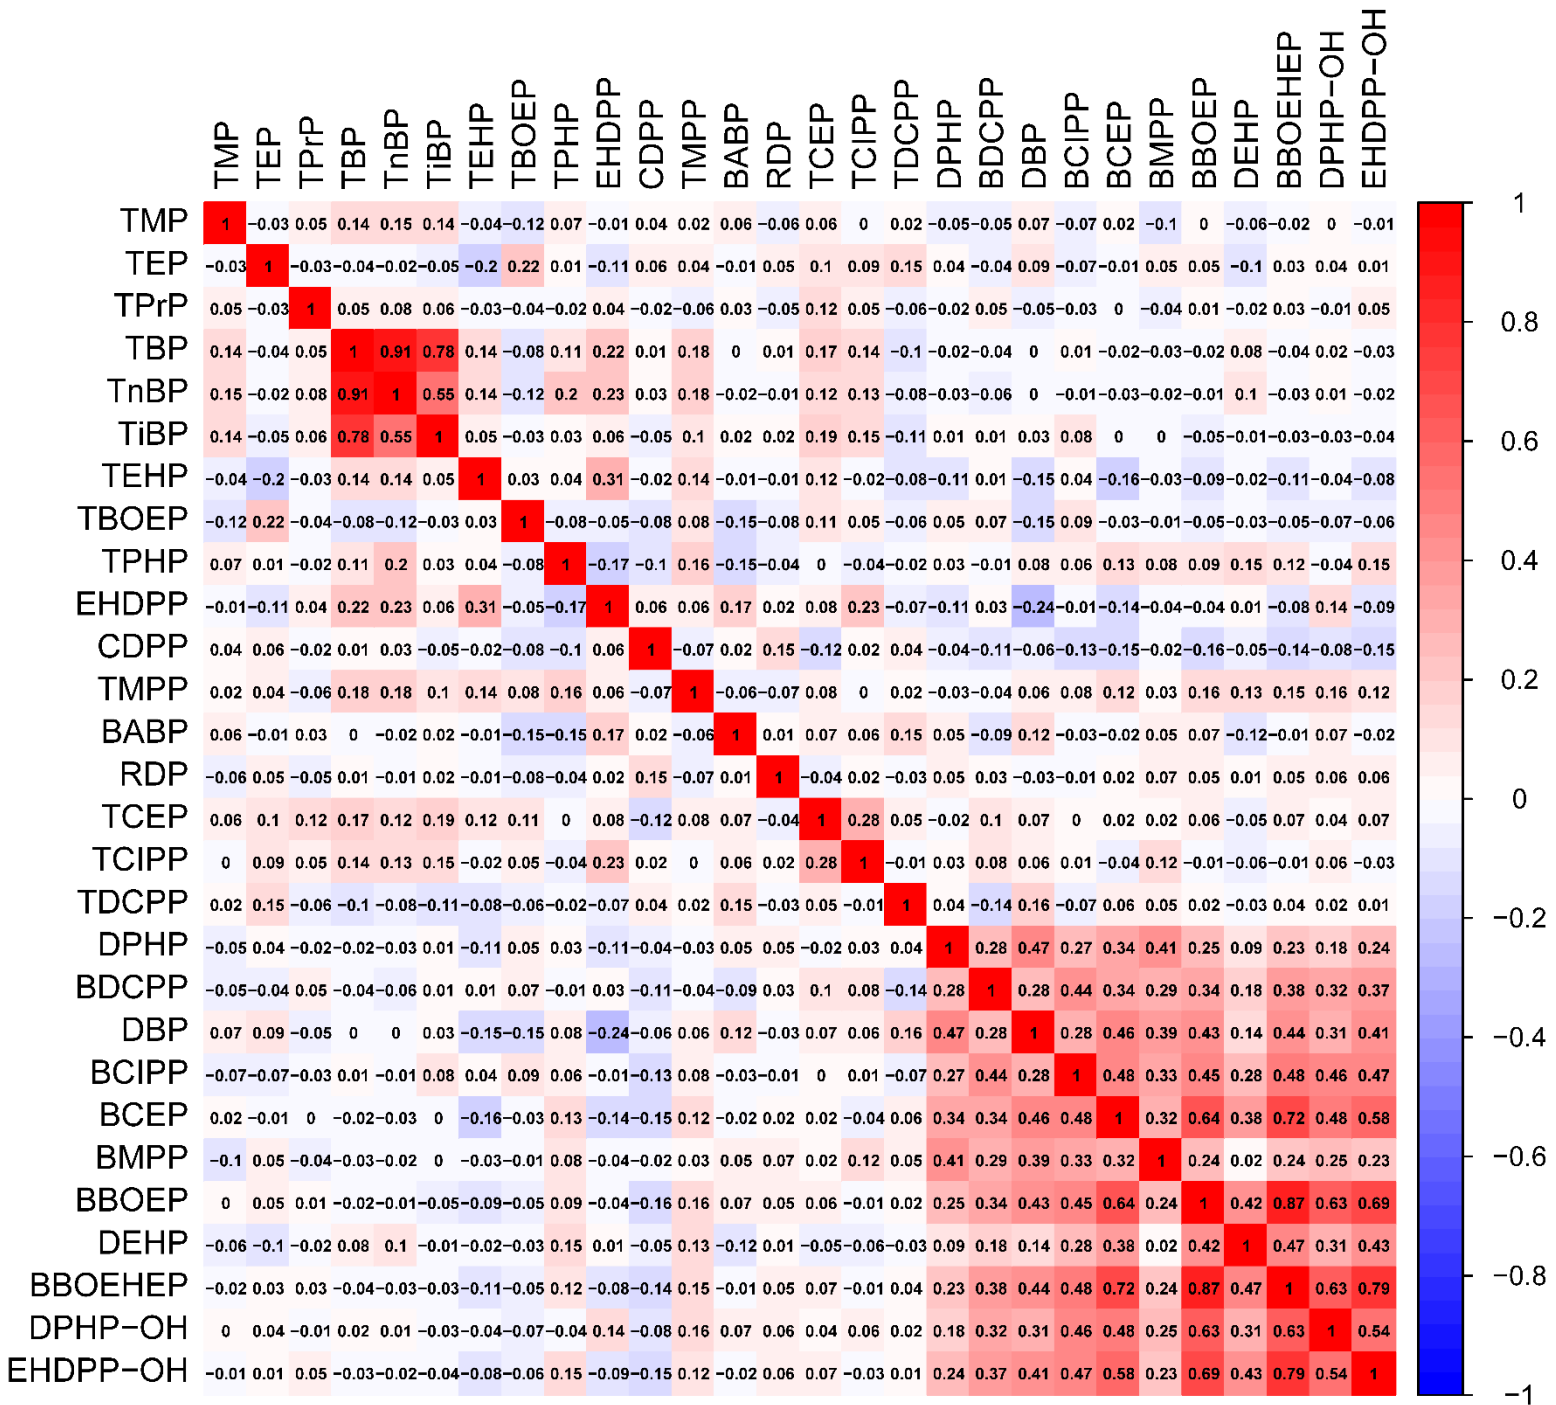



**Figure S2.** Sensitivity analysis results of the associations between OPE exposures and glycometabolic markers.

**(A)** Forest plot of the LMM results between OPE exposures and glycometabolic markers (FPG, GSP, FINS, and HOMA-IR) adjusting for age, sex, BMI, education level, financial income, blood cotinine concentration, other diets (3 days), and month of sample collection. **(B)** Forest plot of the LMM results between OPE exposures and glycometabolic markers (FPG, GSP, FINS, and HOMA-IR) adjusting for age, sex, BMI, education level, financial income, blood cotinine concentration, other diets (3 days), and cups of tea consumption (3 days). **(C)** Forest plot of the LMM results between OPEs exposures and glycometabolic markers (FPG, GSP, FINS, and HOMA-IR) adjusting for age, sex, BMI, education level, financial income, blood cotinine concentration, other diets (3 days), and frequency of alcohol consumption (3 days). The FDR adjusted *P*-values of each predictor are given as \* FDR < 0.05.

Note: see also **Excel Table S4**.

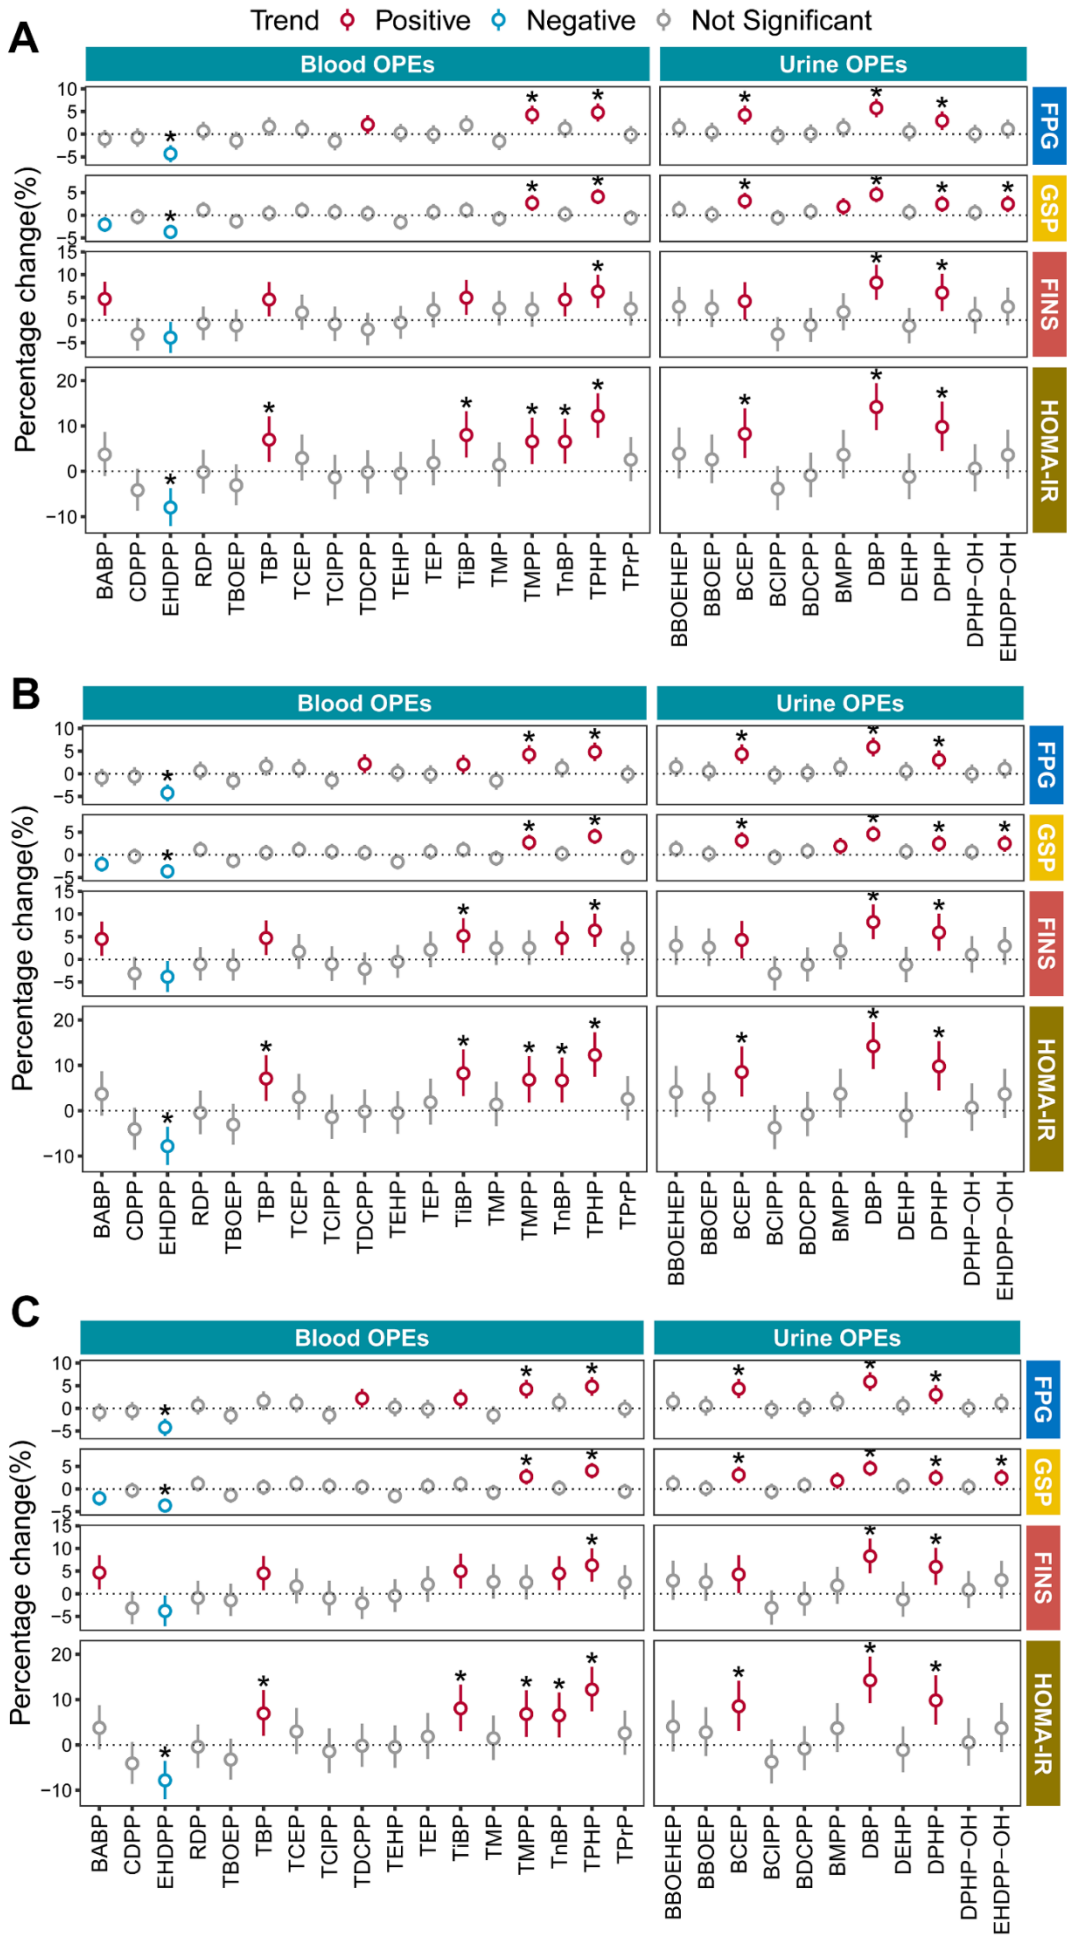

**Figure S3.** Stratification analysis results of the associations between OPE exposures and glycometabolic markers by sex.

Note: see also **Excel Table S5**.

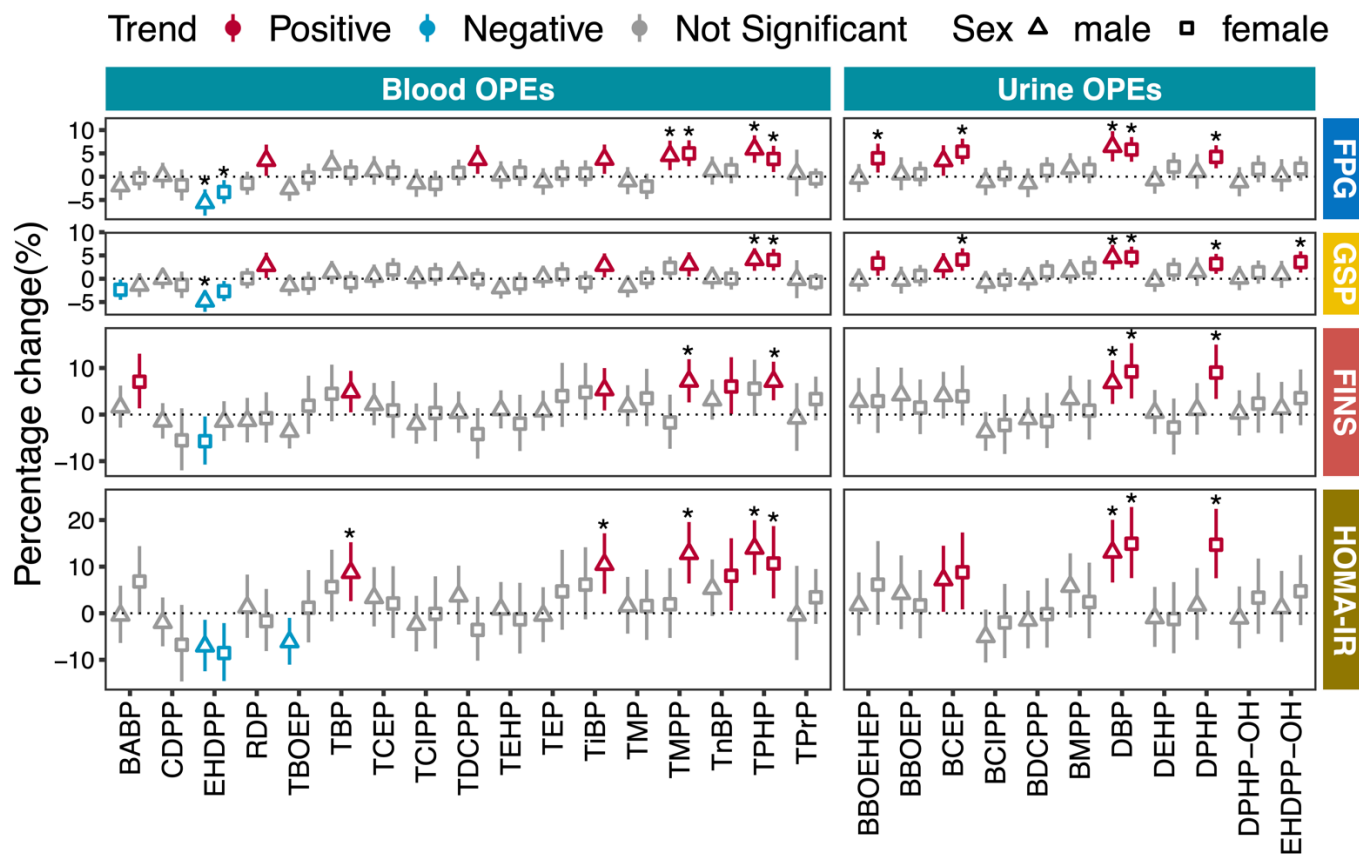

**Figure S4.** Common and specific biomolecular intermediators of individual OPEs.

(A) Upset plot of common and specific biomolecular intermediators of each OPE for metabolome. (B) Upset plot of common and specific biomolecular intermediators of each OPE for transcriptome.

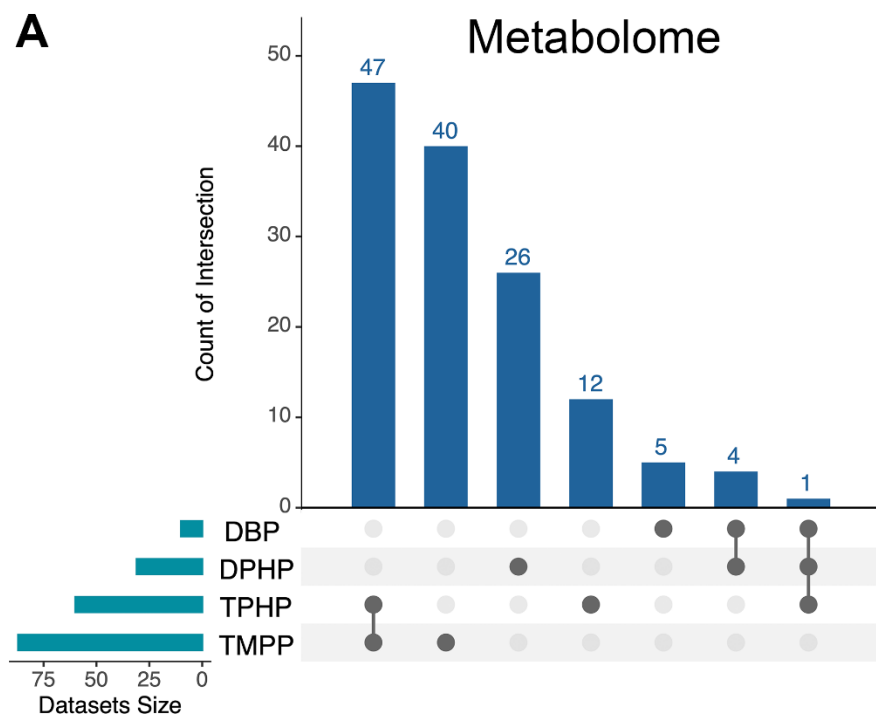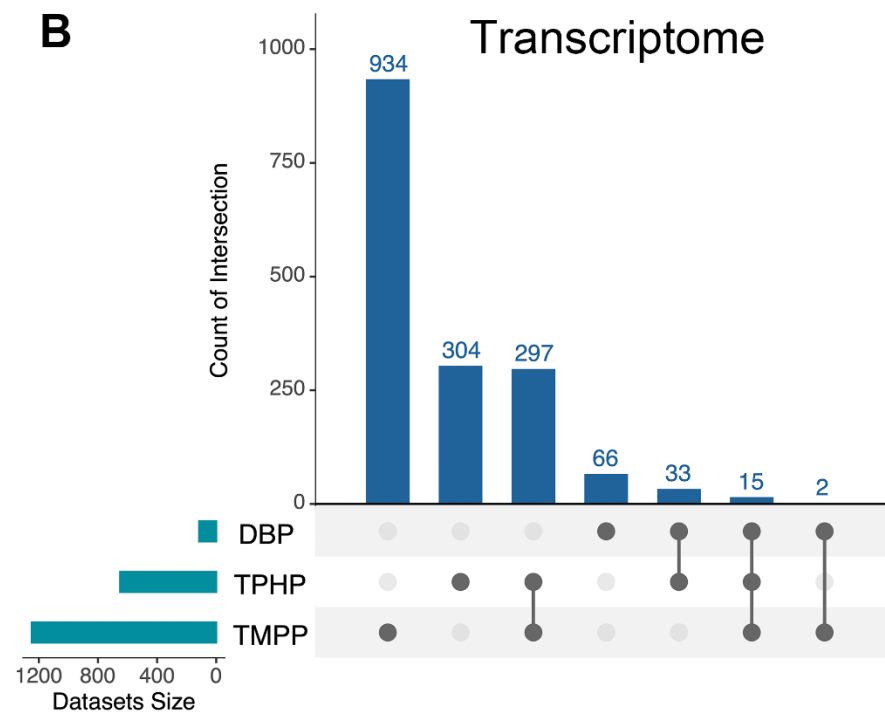

## References

- 1 Wilmanski, T. *et al.* Blood metabolome predicts gut microbiome  $\alpha$ -diversity in humans. *Nature biotechnology* **37**, 1217-1228, doi:10.1038/s41587-019-0233-9 (2019).
- 2 Wang, C. *et al.* Triphenyl phosphate causes a sexually dimorphic metabolism dysfunction associated with disordered adiponectin receptors in pubertal mice. *Journal of hazardous materials* **388**, 121732, doi:10.1016/j.jhazmat.2019.121732 (2020).
- 3 Wang, D. *et al.* Effects of triphenyl phosphate exposure during fetal development on obesity and metabolic dysfunctions in adult mice: Impaired lipid metabolism and intestinal dysbiosis. *Environmental pollution (Barking, Essex : 1987)* **246**, 630-638, doi:10.1016/j.envpol.2018.12.053 (2019).
- 4 Wang, L., Huang, X., Laserna, A. K. C. & Li, S. F. Y. Untargeted metabolomics reveals transformation pathways and metabolic response of the earthworm *Perionyx excavatus* after exposure to triphenyl phosphate. *Scientific reports* **8**, 16440, doi:10.1038/s41598-018-34814-9 (2018).
- 5 Green, A. J. *et al.* Perinatal triphenyl phosphate exposure accelerates type 2 diabetes onset and increases adipose accumulation in UCD-type 2 diabetes mellitus rats. *Reproductive toxicology (Elmsford, N.Y.)* **68**, 119-129, doi:10.1016/j.reprotox.2016.07.009 (2017).
- 6 Du, Z. *et al.* TPhP exposure disturbs carbohydrate metabolism, lipid metabolism, and the DNA damage repair system in zebrafish liver. *Scientific reports* **6**, 21827, doi:10.1038/srep21827 (2016).
- 7 Philbrook, N. A., Restivo, V. E., Belanger, C. L. & Winn, L. M. Gestational triphenyl phosphate exposure in C57Bl/6 mice perturbs expression of insulin-like growth factor signaling genes in maternal and fetal liver. *Birth defects research* **110**, 483-494, doi:10.1002/bdr2.1185 (2018).
- 8 Wang, D. *et al.* Neonatal triphenyl phosphate and its metabolite diphenyl phosphate exposure induce sex- and dose-dependent metabolic disruptions in adult mice. *Environmental pollution (Barking, Essex : 1987)* **237**, 10-17, doi:10.1016/j.envpol.2018.01.047 (2018).
- 9 Adams, S. *et al.* Sex- and age-dependent effects of maternal organophosphate flame-retardant exposure on neonatal hypothalamic and hepatic gene expression. *Reproductive toxicology (Elmsford, N.Y.)* **94**, 65-74, doi:10.1016/j.reprotox.2020.04.001 (2020).
- 10 Walley, S. N. *et al.* Maternal organophosphate flame-retardant exposure alters offspring energy and glucose homeostasis in a sexually dimorphic manner in mice. *Journal of applied toxicology : JAT* **41**, 572-586, doi:10.1002/jat.4066 (2021).
- 11 Vail, G. M. *et al.* The interactions of diet-induced obesity and organophosphate flame retardant exposure on energy homeostasis in adult male and female mice. *Journal of toxicology and environmental health. Part A* **83**, 438-455, doi:10.1080/15287394.2020.1777235 (2020).
- 12 Krumm, E. A. *et al.* Organophosphate Flame-Retardants Alter Adult Mouse Homeostasis and Gene Expression in a Sex-Dependent Manner Potentially Through Interactions With ER $\alpha$ . *Toxicological sciences : an official journal of the Society of Toxicology* **162**, 212-224, doi:10.1093/toxsci/kfx238 (2018).
- 13 Vail, G. M. *et al.* Implications of peroxisome proliferator-activated receptor gamma (PPAR $\gamma$ ) with the intersection of organophosphate flame retardants and diet-induced obesity in adult mice. *Journal of toxicology and environmental health. Part A* **85**, 381-396, doi:10.1080/15287394.2021.2023716 (2022).
- 14 Vail, G. M. *et al.* Implications of estrogen receptor alpha (ER $\alpha$ ) with the intersection of organophosphate flame retardants and diet-induced obesity in adult mice. *Journal of toxicology and environmental health. Part A* **85**, 397-413, doi:10.1080/15287394.2022.2026849 (2022).
- 15 Liu, Y. *et al.* Remodeling on adipocytic physiology of organophosphorus esters in mature adipocytes. *Environmental pollution (Barking, Essex : 1987)* **305**, 119287, doi:10.1016/j.envpol.2022.119287 (2022).
- 16 Gu, J., Su, F., Hong, P., Zhang, Q. & Zhao, M. (1)H NMR-based metabolomic analysis of nine organophosphate flame retardants metabolic disturbance in Hep G2 cell line. *The Science of the total environment* **665**, 162-170, doi:10.1016/j.scitotenv.2019.02.055 (2019).
- 17 Cano-Sancho, G., Smith, A. & La Merrill, M. A. Triphenyl phosphate enhances adipogenic differentiation, glucose uptake

- and lipolysis via endocrine and noradrenergic mechanisms. *Toxicology in vitro : an international journal published in association with BIBRA* **40**, 280-288, doi:10.1016/j.tiv.2017.01.021 (2017).
- 18 Hu, W. *et al.* Triphenyl phosphate modulated saturation of phospholipids: Induction of endoplasmic reticulum stress and inflammation. *Environmental pollution (Barking, Essex : 1987)* **263**, 114474, doi:10.1016/j.envpol.2020.114474 (2020).
- 19 Umamaheswari, S., Karthika, P., Suvenitha, K., Kadirvelu, K. & Ramesh, M. Dose-Dependent Molecular Responses of Labeo rohita to Triphenyl Phosphate. *Chemical research in toxicology* **34**, 2500-2511, doi:10.1021/acs.chemrestox.1c00281 (2021).
- 20 Ramesh, M. *et al.* Organophosphorus flame retardant induced hepatotoxicity and brain AChE inhibition on zebrafish (Danio rerio). *Neurotoxicology and teratology* **82**, 106919, doi:10.1016/j.ntt.2020.106919 (2020).
- 21 Canbaz, D., Logiantara, A., van Ree, R. & van Rijt, L. S. Immunotoxicity of organophosphate flame retardants TPHP and TDCIPP on murine dendritic cells in vitro. *Chemosphere* **177**, 56-64, doi:10.1016/j.chemosphere.2017.02.149 (2017).
- 22 Van den Eede, N. *et al.* Metabolomics analysis of the toxicity pathways of triphenyl phosphate in HepaRG cells and comparison to oxidative stress mechanisms caused by acetaminophen. *Toxicology in vitro : an international journal published in association with BIBRA* **29**, 2045-2054, doi:10.1016/j.tiv.2015.08.012 (2015).
- 23 Yu, X. *et al.* OPFRs and BFRs induced A549 cell apoptosis by caspase-dependent mitochondrial pathway. *Chemosphere* **221**, 693-702, doi:10.1016/j.chemosphere.2019.01.074 (2019).
- 24 Mennillo, E., Cappelli, F. & Arukwe, A. Biotransformation and oxidative stress responses in rat hepatic cell-line (H4IIE) exposed to organophosphate esters (OPEs). *Toxicology and applied pharmacology* **371**, 84-94, doi:10.1016/j.taap.2019.04.004 (2019).
- 25 Chen, G. *et al.* TPP and TCEP induce oxidative stress and alter steroidogenesis in TM3 Leydig cells. *Reproductive toxicology (Elmsford, N.Y.)* **57**, 100-110, doi:10.1016/j.reprotox.2015.05.011 (2015).
- 26 Wang, X., Li, F., Liu, J., Ji, C. & Wu, H. Transcriptomic, proteomic and metabolomic profiling unravel the mechanisms of hepatotoxicity pathway induced by triphenyl phosphate (TPP). *Ecotoxicology and environmental safety* **205**, 111126, doi:10.1016/j.ecoenv.2020.111126 (2020).
- 27 Schang, G., Robaire, B. & Hales, B. F. Organophosphate Flame Retardants Act as Endocrine-Disrupting Chemicals in MA-10 Mouse Tumor Leydig Cells. *Toxicological sciences : an official journal of the Society of Toxicology* **150**, 499-509, doi:10.1093/toxsci/kfw012 (2016).
- 28 An, J. *et al.* The cytotoxicity of organophosphate flame retardants on HepG2, A549 and Caco-2 cells. *Journal of environmental science and health. Part A, Toxic/hazardous substances & environmental engineering* **51**, 980-9888, doi:10.1080/10934529.2016.1191819 (2016).
- 29 Chen, G., Jin, Y., Wu, Y., Liu, L. & Fu, Z. Exposure of male mice to two kinds of organophosphate flame retardants (OPFRs) induced oxidative stress and endocrine disruption. *Environmental toxicology and pharmacology* **40**, 310-318, doi:10.1016/j.etap.2015.06.021 (2015).
- 30 Yuan, S. *et al.* In vitro oxidative stress, mitochondrial impairment and G1 phase cell cycle arrest induced by alkyl-phosphorus-containing flame retardants. *Chemosphere* **248**, 126026, doi:10.1016/j.chemosphere.2020.126026 (2020).
- 31 Yao, Y. *et al.* Exposure to organophosphate ester flame retardants and plasticizers during pregnancy: Thyroid endocrine disruption and mediation role of oxidative stress. *Environment international* **146**, 106215, doi:10.1016/j.envint.2020.106215 (2021).
- 32 Wang, Y. *et al.* Triphenyl phosphate disturbs the lipidome and induces endoplasmic reticulum stress and apoptosis in JEG-3 cells. *Chemosphere* **275**, 129978, doi:10.1016/j.chemosphere.2021.129978 (2021).
- 33 Liu, X. *et al.* Triphenyl phosphate permeates the blood brain barrier and induces neurotoxicity in mouse brain. *Chemosphere* **252**, 126470, doi:10.1016/j.chemosphere.2020.126470 (2020).
- 34 Hong, J. *et al.* Prenatal exposure to triphenyl phosphate activated PPAR $\gamma$  in placental trophoblasts and impaired pregnancy outcomes. *Environmental pollution (Barking, Essex : 1987)* **301**, 119039, doi:10.1016/j.envpol.2022.119039 (2022).
- 35 Wang, X. *et al.* New insights into the mechanism of hepatocyte apoptosis induced by typical organophosphate ester: An integrated in vitro and in silico approach. *Ecotoxicology and environmental safety* **219**, 112342, doi:10.1016/j.ecoenv.2021.112342 (2021).

- 36 Bowen, C. *et al.* Mitochondrial-related effects of pentabromophenol, tetrabromobisphenol A, and triphenyl phosphate on murine BV-2 microglia cells. *Chemosphere* **255**, 126919, doi:10.1016/j.chemosphere.2020.126919 (2020).
- 37 Zhang, Q., Wang, J., Zhu, J., Liu, J. & Zhao, M. Potential Glucocorticoid and Mineralocorticoid Effects of Nine Organophosphate Flame Retardants. *Environmental science & technology* **51**, 5803-5810, doi:10.1021/acs.est.7b01237 (2017).
- 38 Kojima, H., Takeuchi, S., Van den Eede, N. & Covaci, A. Effects of primary metabolites of organophosphate flame retardants on transcriptional activity via human nuclear receptors. *Toxicology letters* **245**, 31-39, doi:10.1016/j.toxlet.2016.01.004 (2016).
- 39 Kojima, H. *et al.* In vitro endocrine disruption potential of organophosphate flame retardants via human nuclear receptors. *Toxicology* **314**, 76-83, doi:10.1016/j.tox.2013.09.004 (2013).
