# Supplementary material
Source: PubMed Central journal article supplement (PMC10094192)
Supplement: ehp11896.smcontents.508.pdf [file ehp11896.smcontents.508.pdf]

**Note to readers with disabilities:** *EHP* strives to ensure that all journal content is accessible to all readers. However, some figures and Supplemental Material published in *EHP* articles may not conform to [508 standards](#) due to the complexity of the information being presented. If you need assistance accessing journal content, please contact [ehp508@niehs.nih.gov](mailto:ehp508@niehs.nih.gov). Our staff will work with you to assess and meet your accessibility needs within 3 working days.

### **Supplemental Material**

#### **Association between Organophosphate Ester Exposure and Insulin Resistance with Glycometabolic Disorders among Older Chinese Adults 60–69 Years of Age: Evidence from the China BAPE Study**

Enmin Ding, Fuchang Deng, Jianlong Fang, Tiantian Li, Minmin Hou, Juan Liu, Ke Miao, Wenyan Yan, Ke Fang, Wanying Shi, Yuanzheng Fu, Yuanyuan Liu, Haoran Dong, Li Dong, Changming Ding, Xiaohui Liu, Krystal J. Godri Pollitt, John S. Ji, Yali Shi, Yaqi Cai, Song Tang, and Xiaoming Shi

#### **Table of Contents**

**Table S1.** Variable information of 17 blood OPEs and 11 urine OPE metabolites.

**Table S2.** Descriptive statistics of the results from the daily time-activity surveys (for the three consecutive days prior to the physical examination) of participants for each of the five visits.

**Table S3.** Changes in the z-scores of glycometabolic markers with a quantile increase in the mixture concentration.

**Table S4.** Relative weight of each pollutant within four chemical mixtures.

**Table S5.** Proportions and overall averages of associated serum metabolite in each class for the key OPEs.

**Table S6.** Proportions and overall averages of the associated urine metabolite in each class for the key OPEs.

**Table S7.** Representative toxicological literature on the associations between OPEs and glycometabolic marker.

**Table S8.** Representative toxicological literature on the molecular mechanisms of OPEs.

**Figure S1.** Pairwise spearman correlations of the 28 OPE exposures.

**Figure S2.** Sensitivity analysis results of the associations between OPE exposures and glycometabolic markers.

**Figure S3.** Stratification analysis results of the associations between OPE exposures and glycometabolic markers by sex.

**Figure S4.** Common and specific biomolecular intermediators of individual OPEs.

## **References**

**Additional File-** Excel Document
